# Supplementary material for: IGFBP-4 regulates adult skeletal growth in a sex-specific manner
Source: PubMed Central journal article supplement (PMC5425953; doi:10.1530/joe-16-0673), 2017-02-09
Supplement: joe-233-131-s001.pdf [file joe-233-131-s001.pdf]

**Femur****iWAT****gWAT****Liver**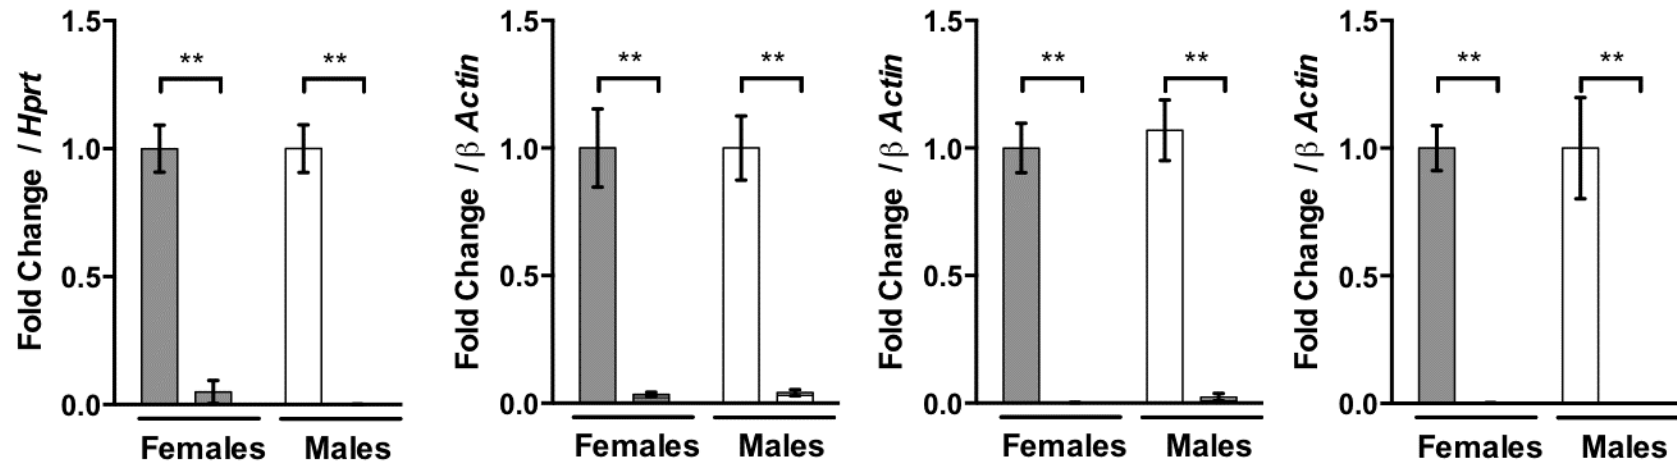**Females****Males**■ *Igfbp4*<sup>+/+</sup>□ *Igfbp4*<sup>+/+</sup>■ *Igfbp4*<sup>-/-</sup>□ *Igfbp4*<sup>-/-</sup>
